# Supplementary material for: An azo-coupling reaction-based surface enhanced resonance Raman scattering approach for ultrasensitive detection of salbutamol
Source: Royal Society of Chemistry journal article supplement (doi:10.1039/c7ra12927k), 2018-01-01
Supplement: c7ra12927k1.pdf [file c7ra12927k1.pdf]

## Azo-coupling Reaction-Based Surface Enhanced Resonance Raman Scattering Approach for Ultrasensitive Detection of Salbutamol

Shihua Yu,<sup>ab</sup> Zhigang Liu,<sup>c</sup> Jianpo Zhang,<sup>b</sup> Hongwei Li,<sup>a</sup> Na Xu,<sup>d</sup> Xin-xin Yuan,<sup>a</sup> Yuqing Wu<sup>a\*</sup>

(Supporting Information)

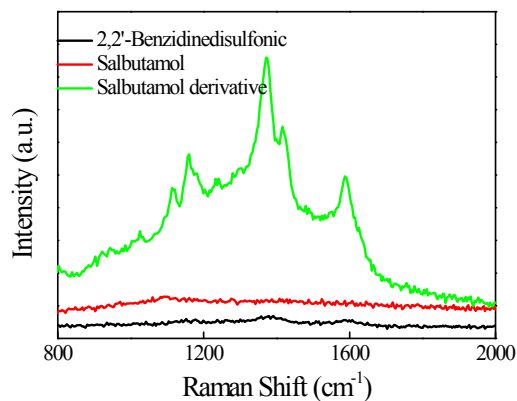

Figure S1. SERS spectrum of 10 mM SAL, 2,2'-Benzidinedisulfonic acid and SAL derivative, respectively.

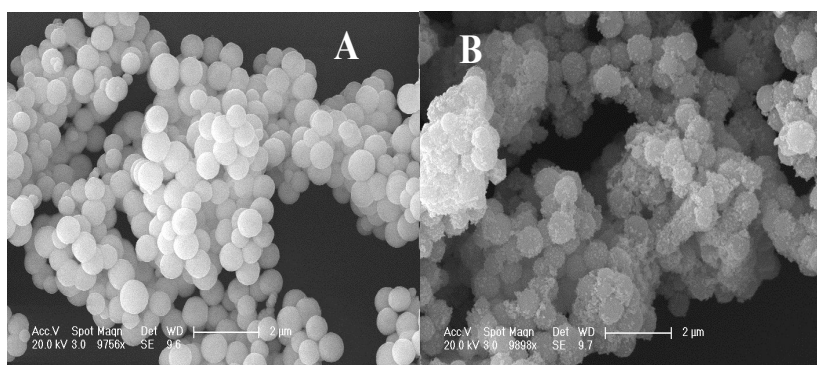

Figure S2. SEM image of the magnetic nanoparticle of (A) Fe<sub>3</sub>O<sub>4</sub> and (B) Fe<sub>3</sub>O<sub>4</sub>@Ag, respectively.

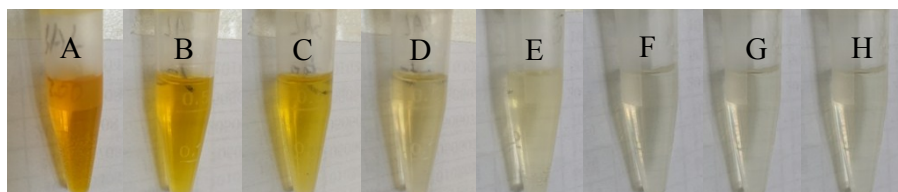

Figure S3. Representative photography of the colorimetric sensing to different concentration of (A)  $8.37 \times 10^{-4}$  M, (B)  $4.18 \times 10^{-4}$  M, (C)  $2.09 \times 10^{-4}$  M, (D)  $4.18 \times 10^{-5}$  M, (E)  $2.09 \times 10^{-5}$  M, (F)  $1.05 \times 10^{-5}$  M, (G)  $4.18 \times 10^{-6}$  M, and (H) 0 M, respectively, for SAL in solution.

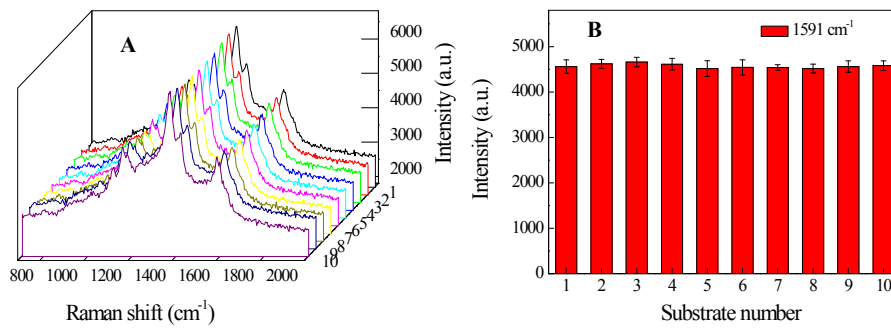

**Figure S4.** Examination of the reproducibility for azo reaction-based SERRS in SAL detection. (A) Sample-to-sample SERRS spectra of SAL from 10 parallel batches with a concentration of  $1.0 \times 10^{-7}$  M, which are measured on randomly selected spot. (B) The corresponding SERRS intensity variation at  $1591 \text{ cm}^{-1}$ . Each intensity value with error bar represents the average one obtained from different spots.

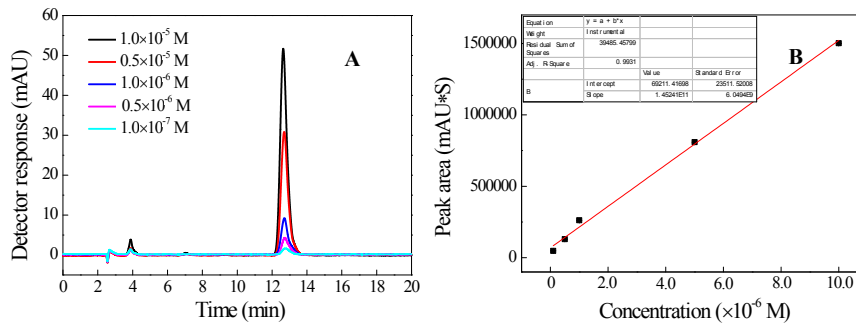

**Figure S5.** (A) Chromatograms of SAL at different concentrations; (B) Standard curves of SAL from the data of (A).

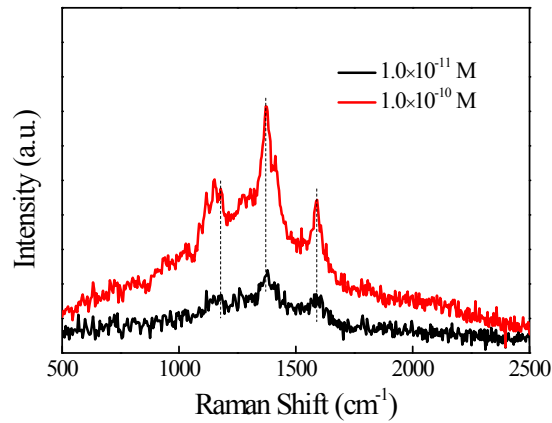

**Figure S6.** Determination of the limit of detection (LOD) for real sample.

**Table S1.** A comparison of different methods for SAL detection.

| No. | Methods                                      | Detection limit                | Detection time for real sample | Ref.                                                     |
|-----|----------------------------------------------|--------------------------------|--------------------------------|----------------------------------------------------------|
| 1   | ICT-SERS                                     | 3.0 pg/mL (standard solution)  | > 21 min                       | <i>Food Anal. Methods</i> , 2016, <b>9</b> , 3396-3406.  |
| 2   | Immunoassays SPR                             | 100 ng/mL (standard solution)  | –                              | <i>Biosens. Bioelectron.</i> , 2015 <b>67</b> , 356-363. |
| 3   | SERS                                         | 765 ng/mL (standard solution)  | –                              | <i>Langmuir</i> , 2010, <b>26</b> , 14663–14670.         |
| 4   | SERS                                         | 2 g/L (standard solution)      | 30 min                         | <i>Chin. J Anal. Chem.</i> , 2012, <b>40</b> , 718-723.  |
| 5   | Flow injection chemiluminescence immunoassay | 0.15 ng/mL (standard solution) | –                              | <i>Sens. Actuator B</i> , 2015, <b>215</b> , 323-329.    |
| 6   | LC-MS/MS                                     | 0.3 ng/mL (urine)              | > 16 h                         | <i>J Chromatogr. B</i> , 2016, <b>1025</b> , 83-91.      |
| 7   | Electrochemical immunoassay                  | 1.44 pg/mL (standard solution) | –                              | <i>Biosens. Bioelectron.</i> , 2013, <b>49</b> , 14-19.  |
| 8   | Azo-coupling reaction-based SERRS            | 1.0×10 <sup>-10</sup> M (meat) | < 10 min                       | This work                                                |
